# Supplementary material
Source: PubMed Central journal article supplement (PMC3972286)
Supplement: NIHMS554693-supplement-supplement_1.pdf [file NIHMS554693-supplement-supplement_1.pdf]

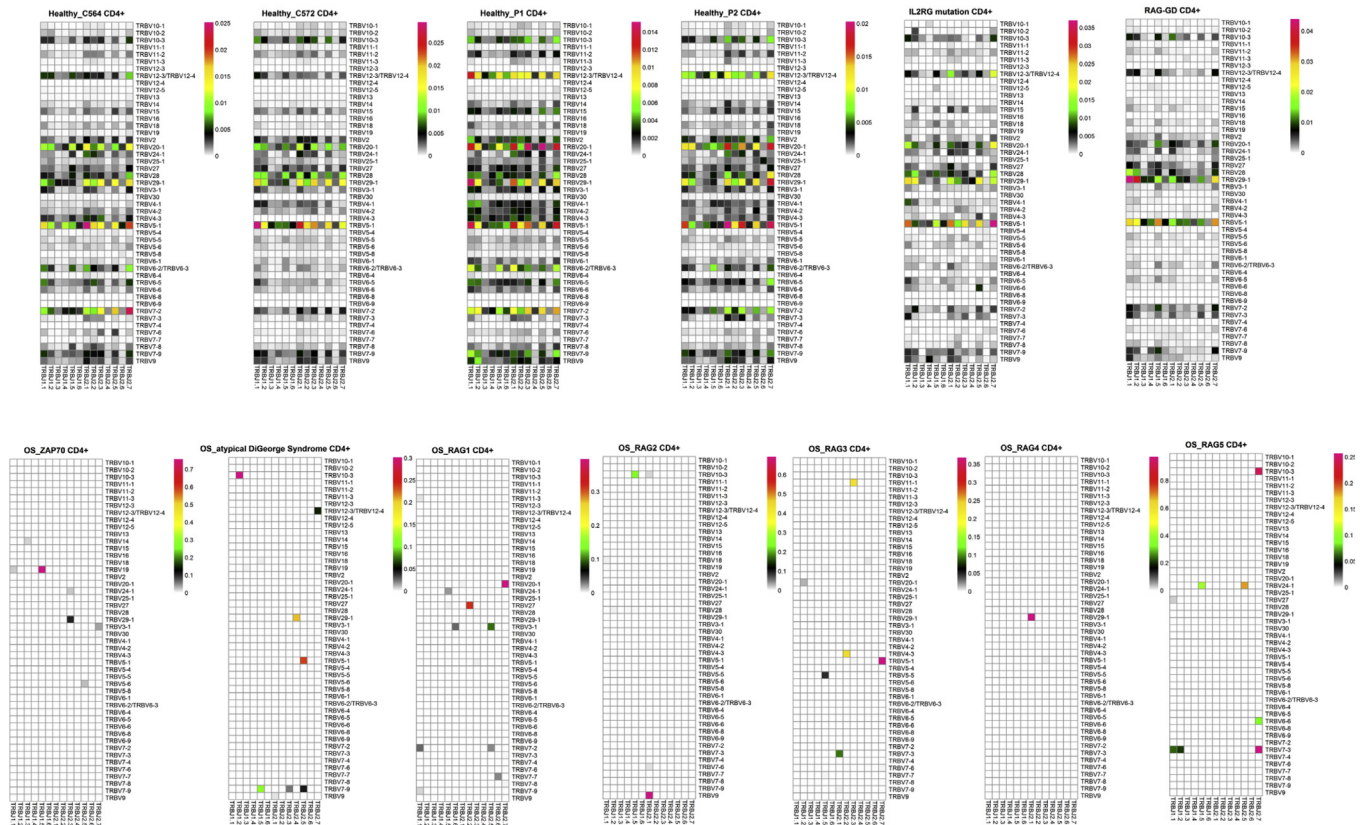

**FIG E1.** Two-dimensional heat maps of TCRβ V-J use for CD4<sup>+</sup> T cells from each subject. The different Vβ genes are on the longitudinal ordinate, and the different Jβ genes are on the horizontal ordinate.

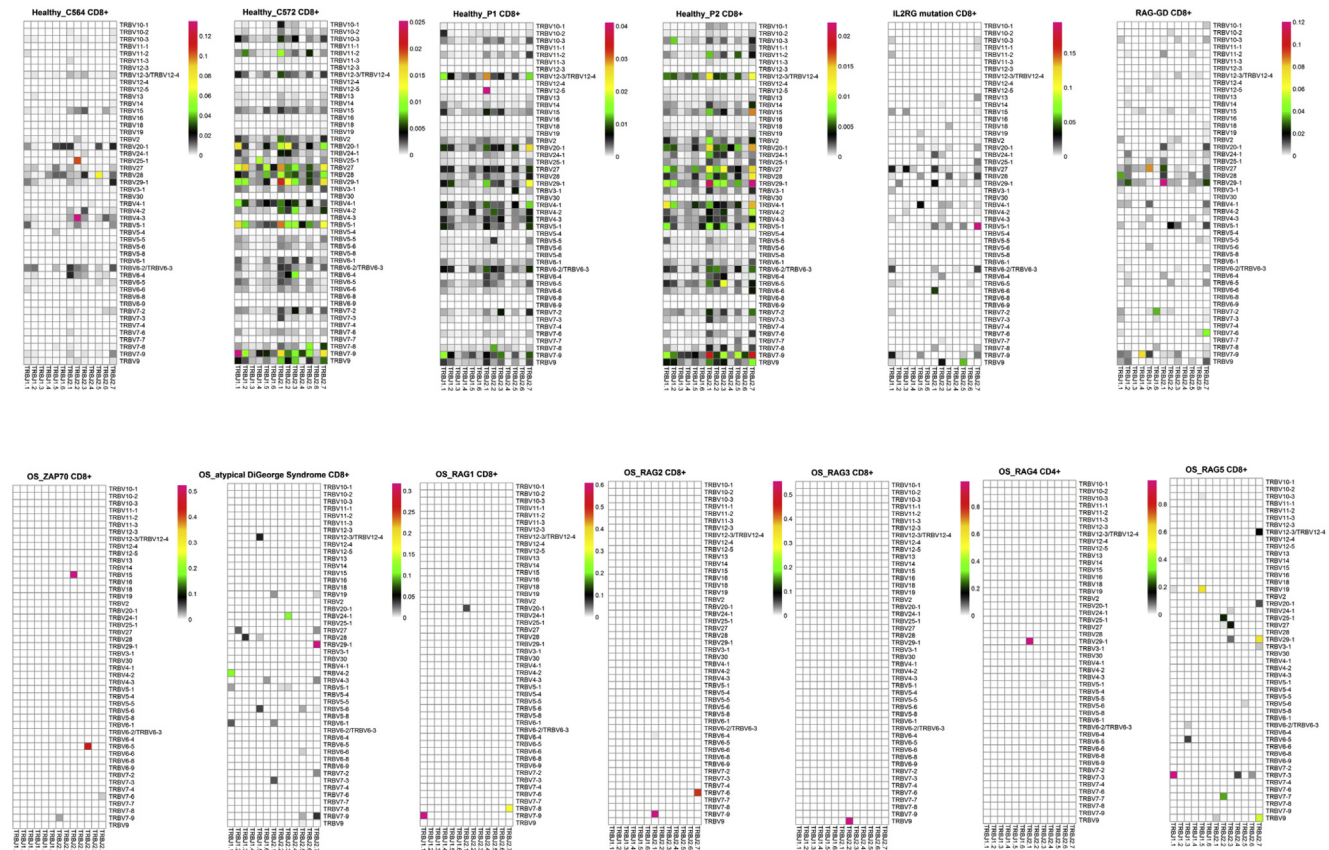

**FIG E2.** Two-dimensional heat maps of TCRβ V-J use for CD8<sup>+</sup> T cells from each subject. The different Vβ genes are on the longitudinal ordinate, and the different Jβ genes are on the horizontal ordinate.

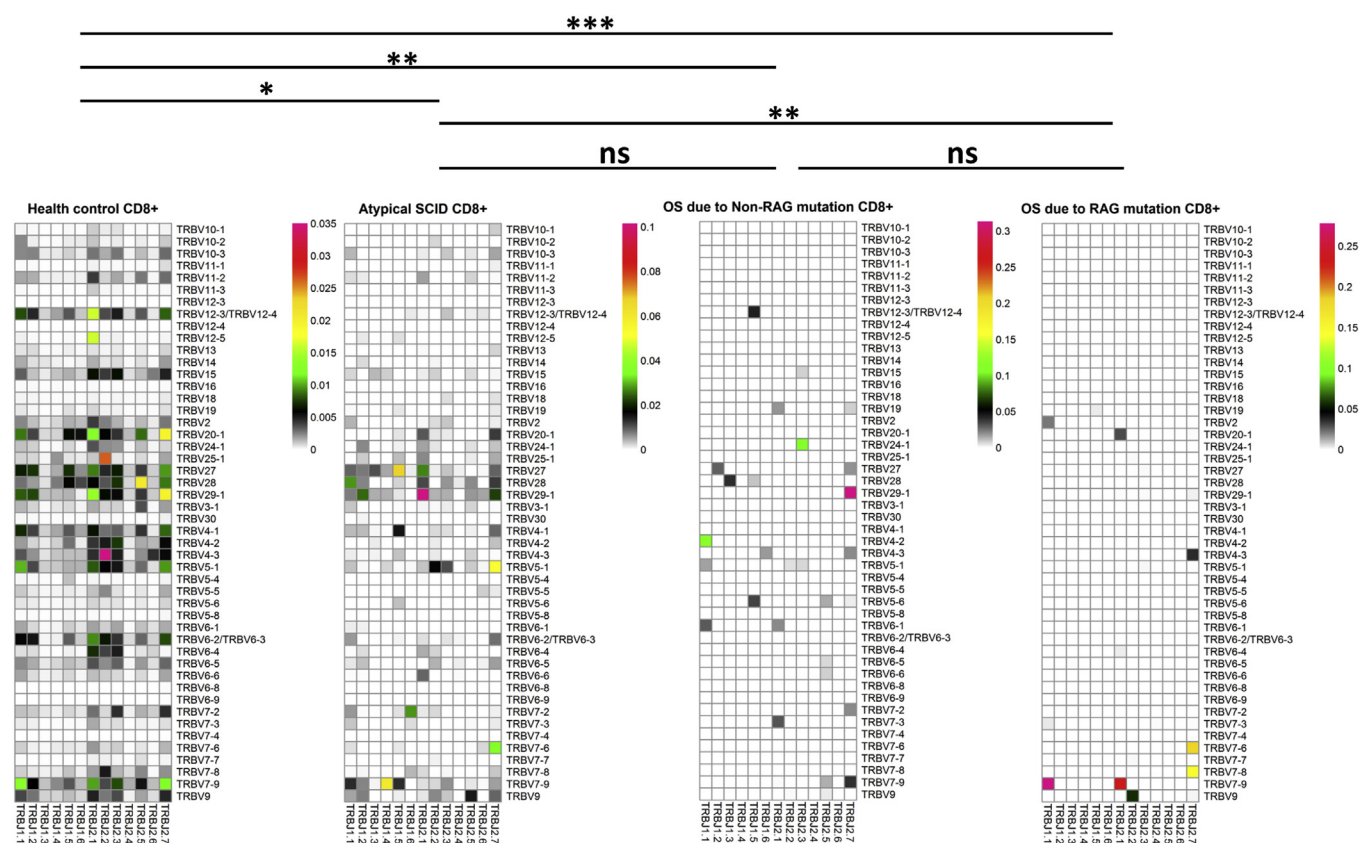

**FIG E3.** Two-dimensional heat maps of TCRβ V-J use for CD8<sup>+</sup> T cells from healthy control subjects, patients with atypical SCID (*IL2RG* mutation and granulomatous disease caused by *RAG* mutation—*RAG* granulomatous disease), patients with OS caused by non-*RAG* mutations, and patients with OS caused by *RAG* mutations. The different Vβ genes are on the longitudinal ordinate, and the different Jβ genes are on the horizontal ordinate. *P* values of unpaired *t* tests are shown: \**P* < .05, \*\**P* < .01, and \*\*\**P* < .001. *ns*, Nonsignificant.

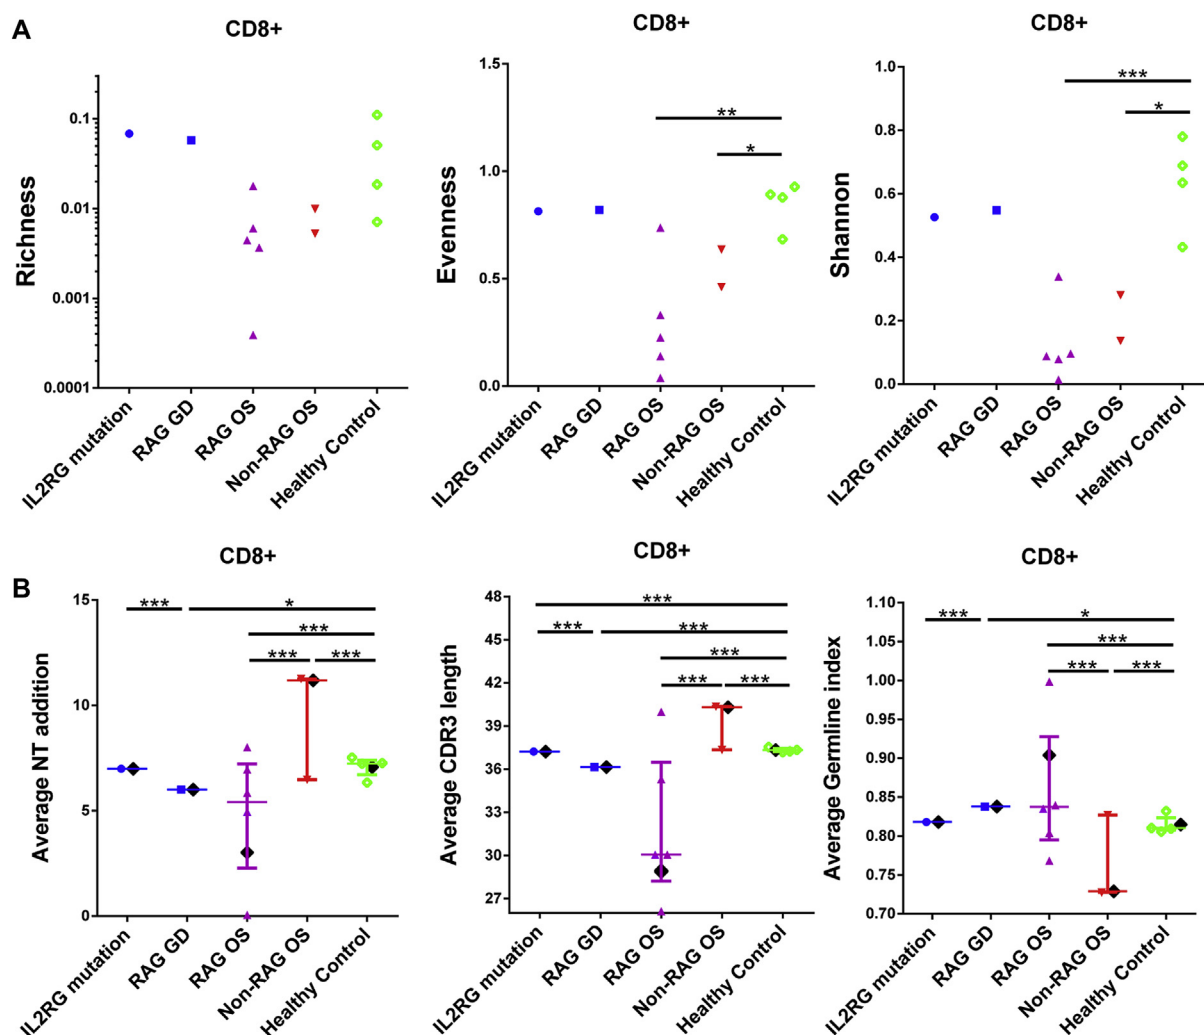

**FIG E4.** Repertoire characteristics of CD8<sup>+</sup> T cells from patients and healthy control subjects. Richness, evenness, and Shannon entropy (**A**) and junctional nucleotide additions, CDR3 length, and germline index (**B**) were calculated for total annotated TCR $\beta$  sequence reads from individual patients, as well as total annotated TCR $\beta$  sequence reads from all subjects in same group, and compared with each other. Patients with atypical SCID, patients with OS caused by *RAG* mutations (*RAG OS*), patients with OS caused by non-*RAG* mutations (*Non-RAG OS*), and healthy control subjects are shown in blue, purple, red, and green, respectively. The black diamond represents the mean value calculated from pooled TCR $\beta$  sequences from all subjects of the same group. Medians with interquartile ranges are shown in each group. *P* values of unpaired *t* tests are shown as follows: \*.01 < *P* < .05, \*\*.001 < *P* < .01, and \*\*\**P* < .001.

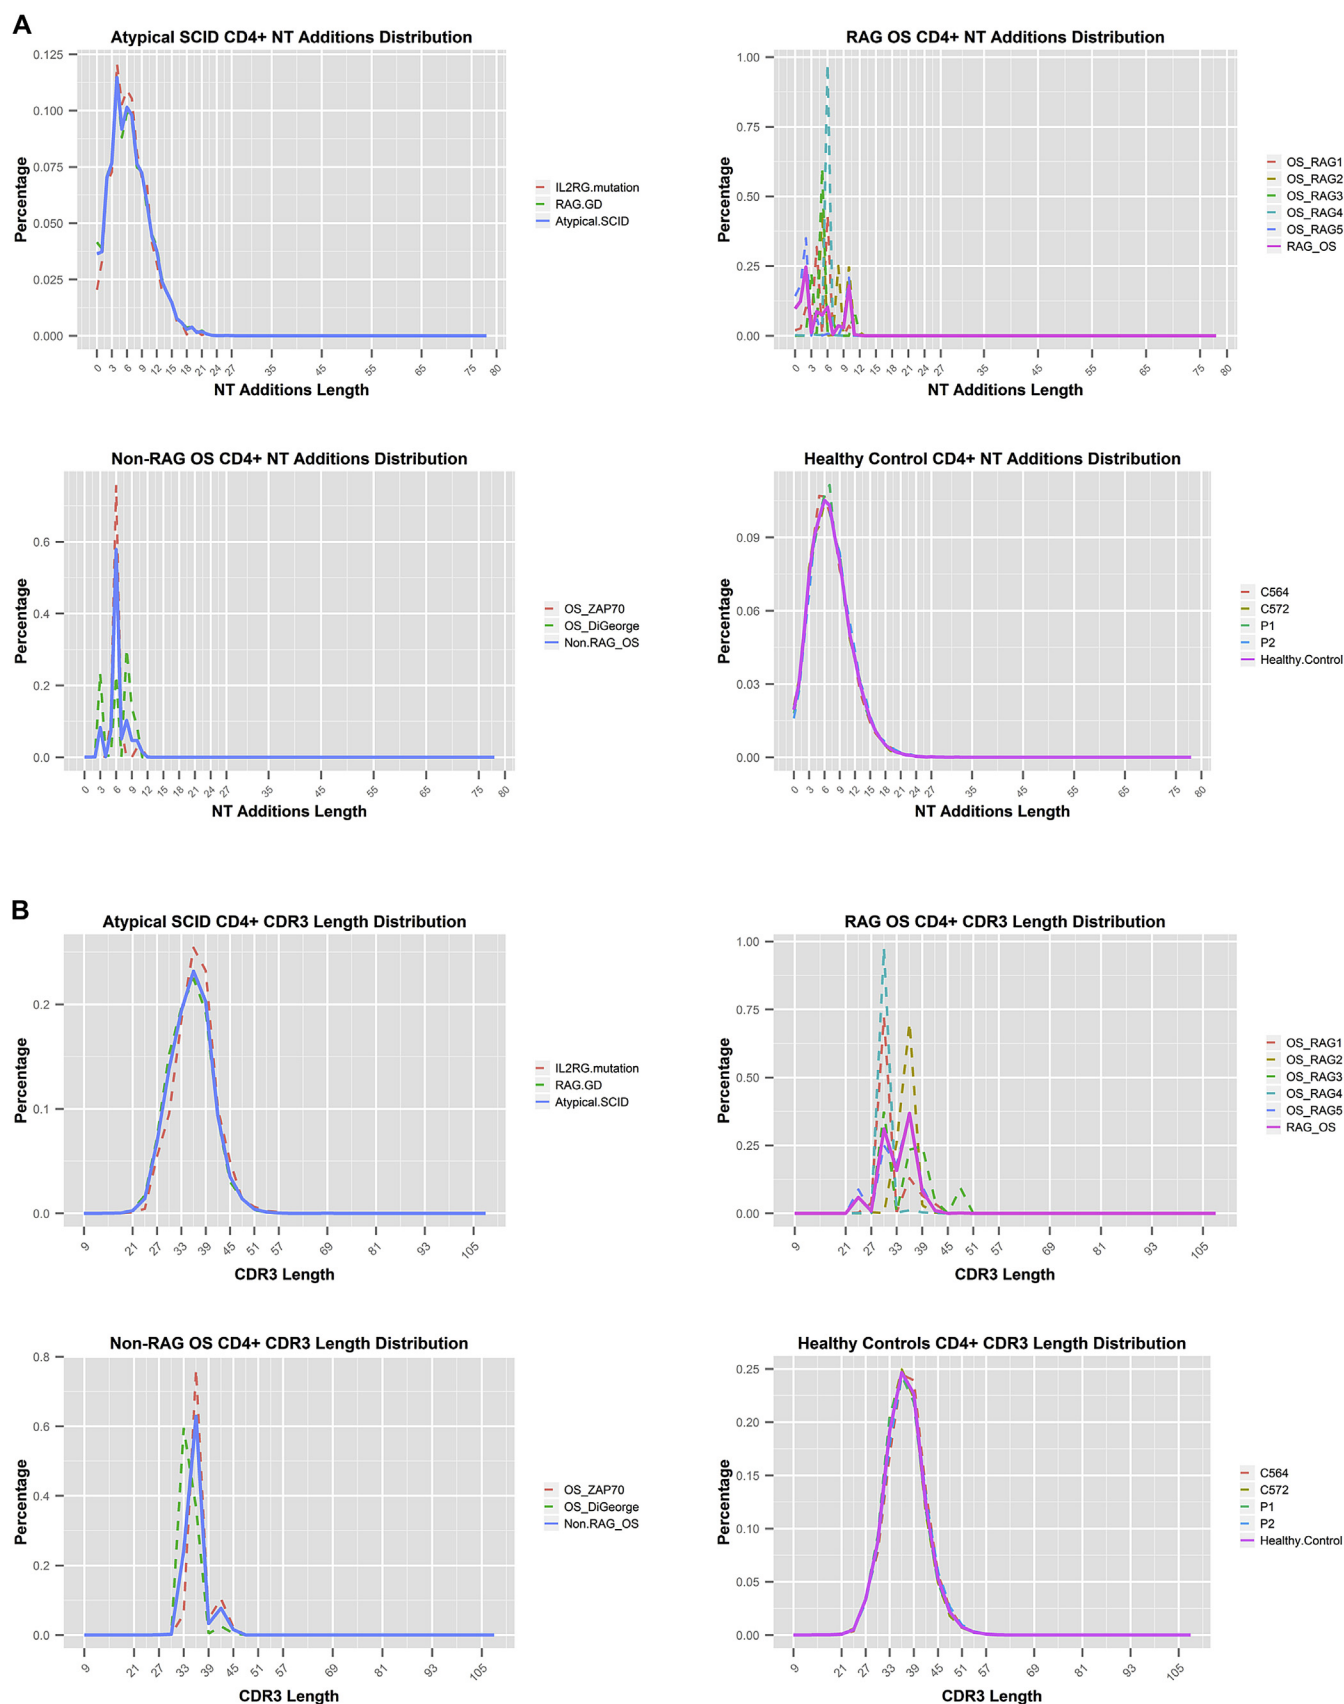

**FIG E5. A,** Nucleotide (NT) additions in junctional regions of CDR3 for all unique CD4<sup>+</sup> T-cell TCR $\beta$  sequences from patients with atypical SCID, patients with OS caused by RAG mutations, patients with OS caused by non-RAG mutations, and healthy control subjects. **B,** CDR3 length distribution of all unique CD4<sup>+</sup> T-cell TCR $\beta$  sequences from patients with atypical SCID, patients with OS caused by RAG mutations, patients with OS caused by non-RAG mutations, and healthy control subjects.

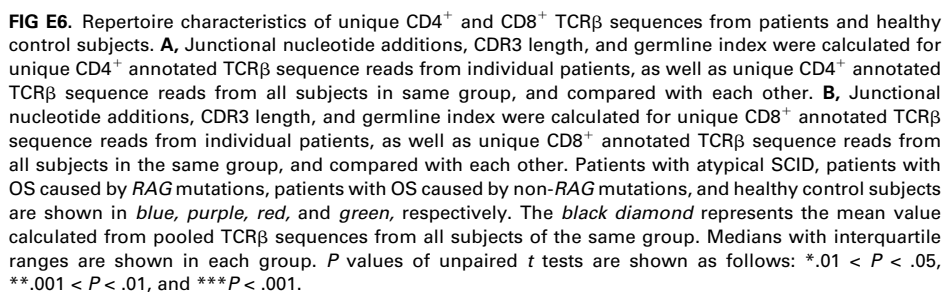

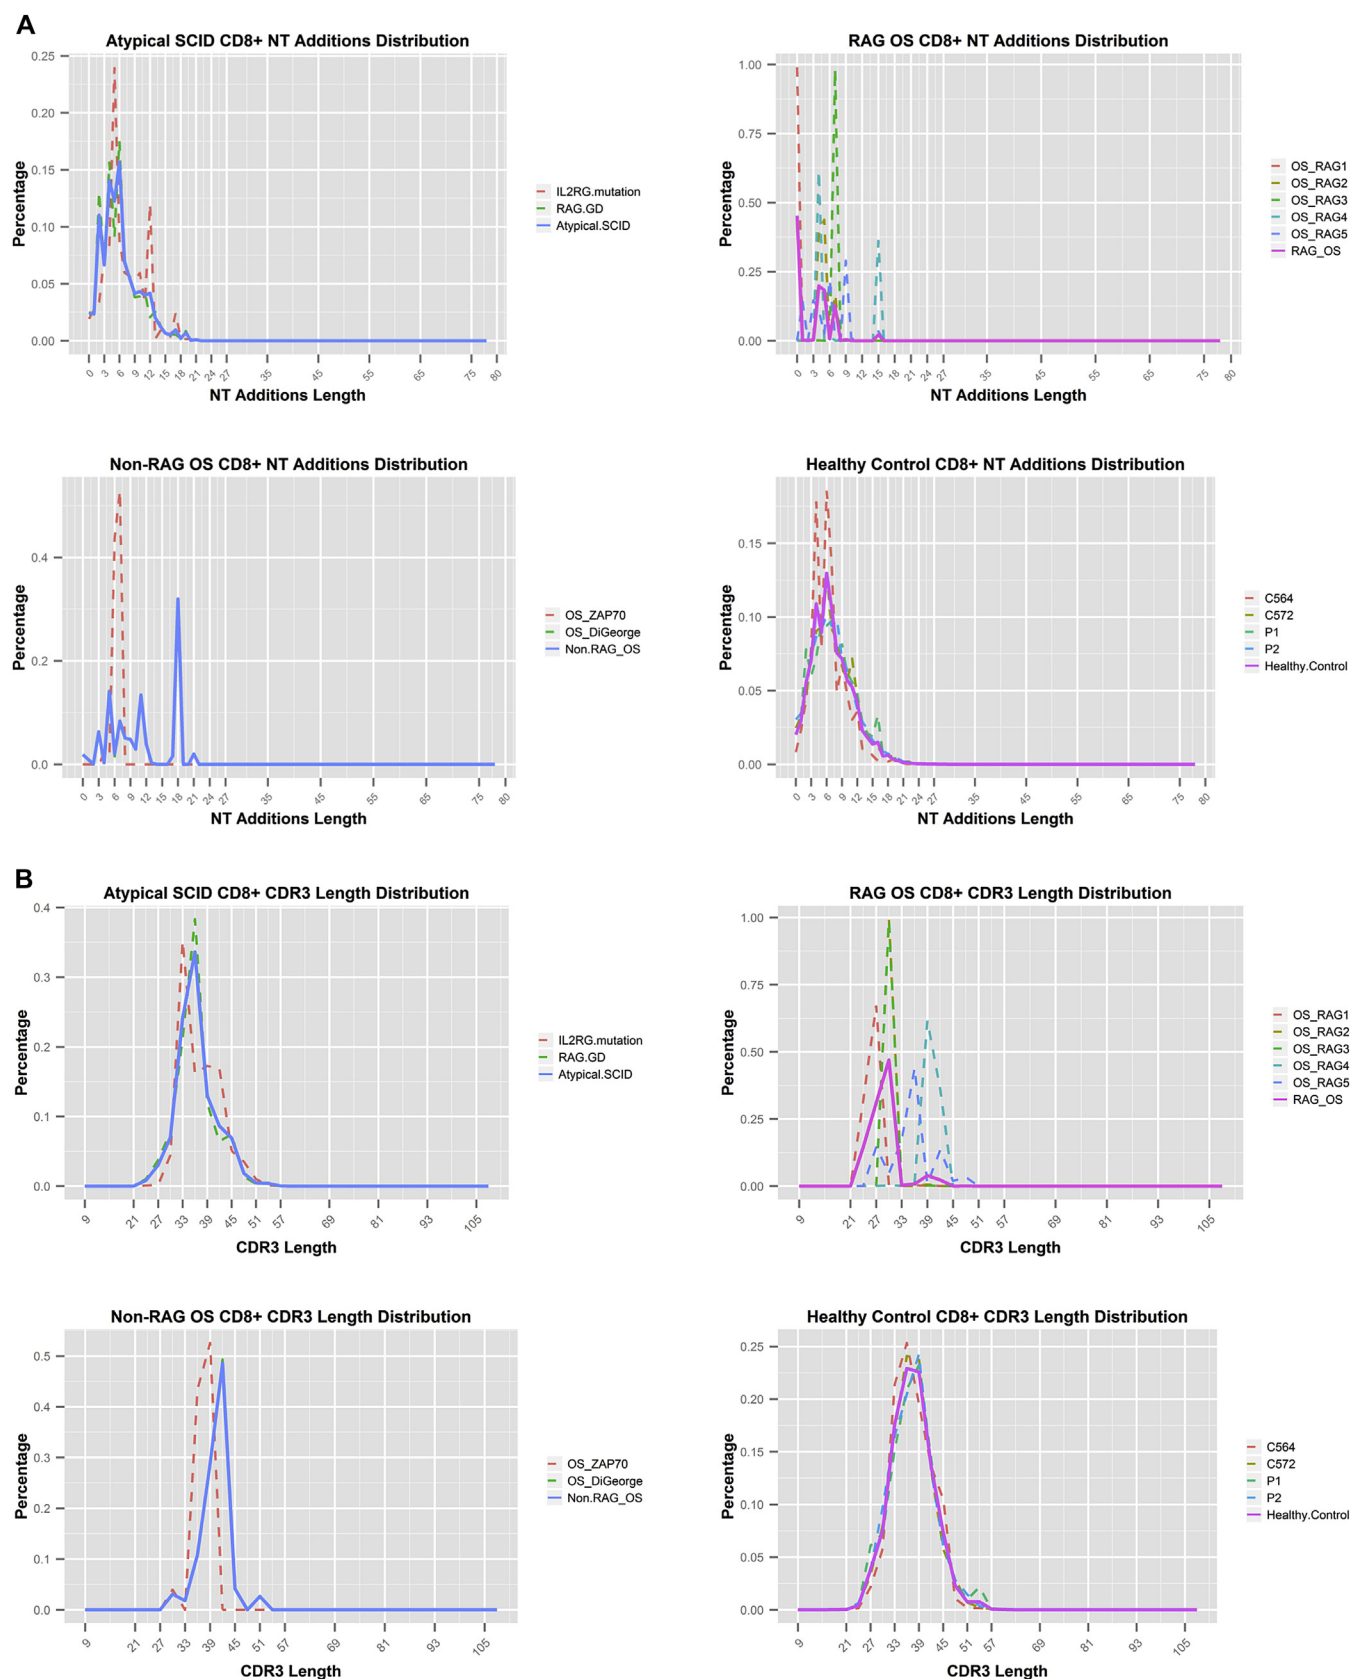

**FIG E7. A**, Nucleotide (NT) additions in junctional regions of CDR3 for all unique CD8<sup>+</sup> T-cell TCR $\beta$  sequences from patients with atypical SCID, patients with OS caused by *RAG* mutations, patients with OS caused by non-*RAG* mutations, and healthy control subjects. **B**, CDR3 length distribution of all unique CD8<sup>+</sup> T-cell TCR $\beta$  sequences from patients with atypical SCID, patients with OS caused by *RAG* mutations, patients with OS caused by non-*RAG* mutations, and healthy control subjects.

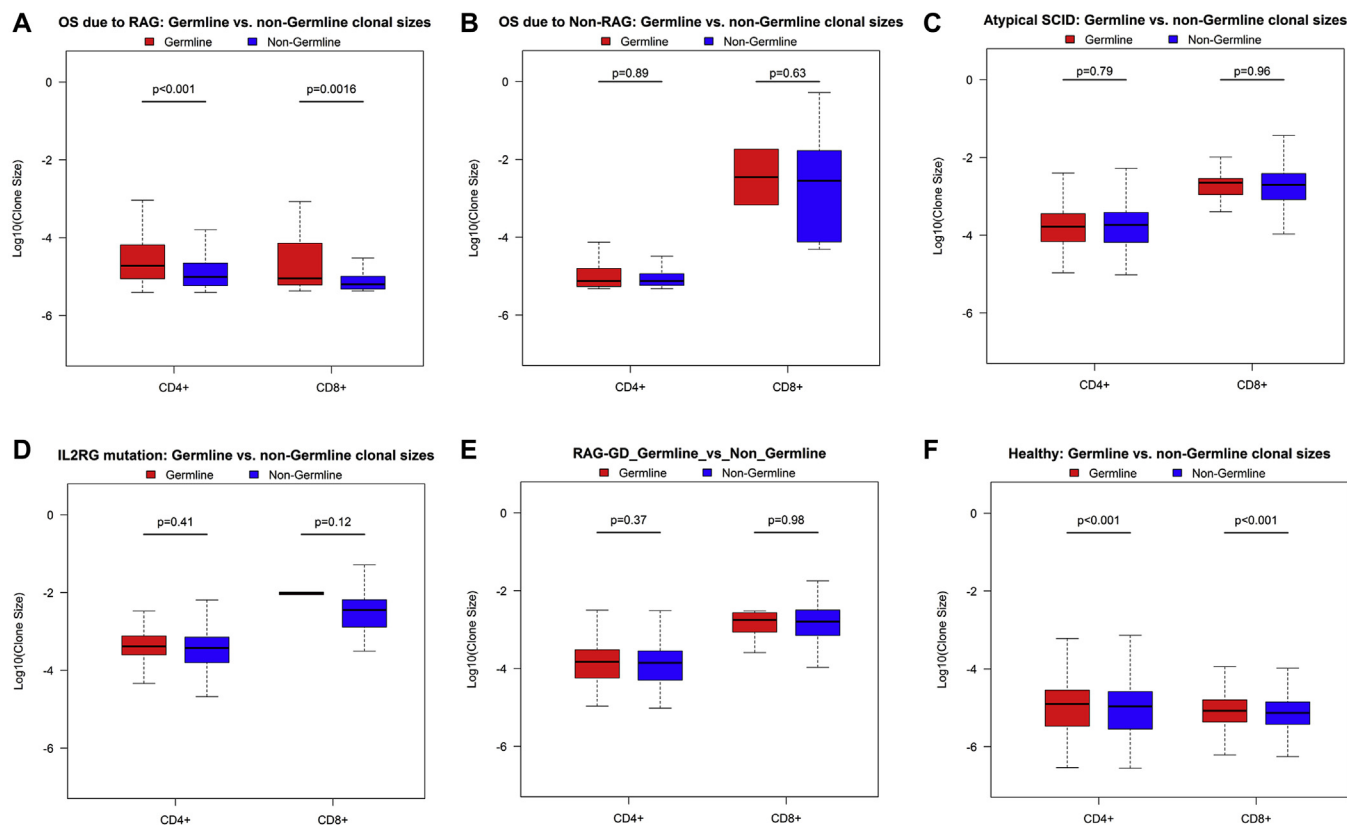

**FIG E8.** **A**, Box plots show that the clone size of CD4<sup>+</sup> and CD8<sup>+</sup> T-cell germline sequences is significantly bigger than that of nongermline TCRβ sequences in patients with OS caused by *RAG* mutations. **B**, Box plots show that the clone size of CD4<sup>+</sup> and CD8<sup>+</sup> T-cell germline sequences is slightly bigger than that of nongermline TCRβ sequences in patients with OS caused by non-*RAG* mutations. **C**, Box plots show that the clone size of CD4<sup>+</sup> T-cell germline sequences is slightly smaller than that of nongermline TCRβ sequences in patients with atypical SCID and the clone size of CD8<sup>+</sup> T-cell germline sequences is slightly bigger than that of nongermline TCRβ sequences. **D**, Box plots show that the clone size of CD4<sup>+</sup> and CD8<sup>+</sup> T-cell germline sequences is slightly bigger than that of nongermline TCRβ sequences in patient with *IL2RG* mutations. **E**, Box plots show that the clone size of CD4<sup>+</sup> and CD8<sup>+</sup> T-cell germline sequences is slightly bigger than that of nongermline TCRβ sequences in patients with granulomatous disease caused by *RAG* mutations. **F**, Box plots show that the clone size of CD4<sup>+</sup> and CD8<sup>+</sup> T-cell germline sequences is significantly bigger than that of nongermline TCRβ sequences in healthy control subjects. *P* values of the Wilcoxon rank sum test are shown.

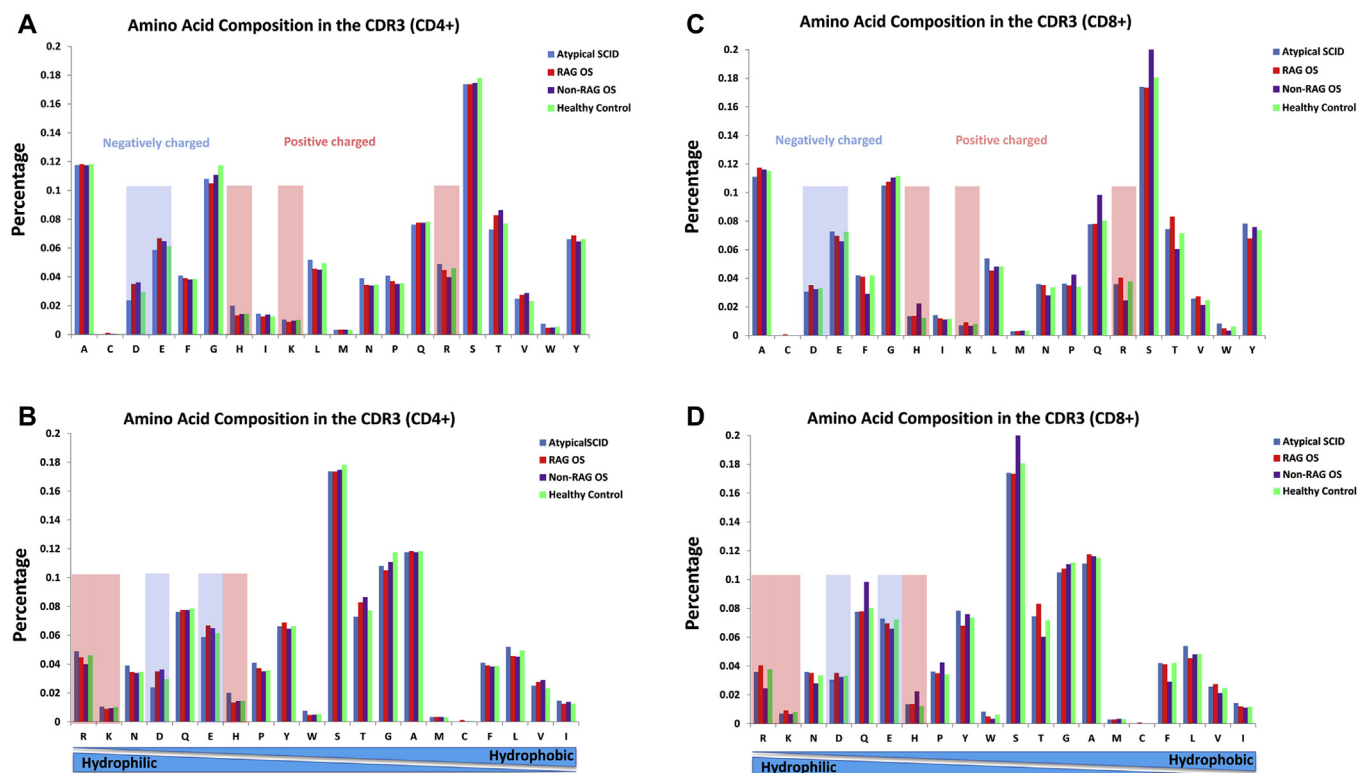

**FIG E9.** **A**, Amino acid frequencies of CDR3s for all unique CD4<sup>+</sup> T-cell TCR $\beta$  sequences from patients with atypical SCID, patients with OS caused by *RAG* mutations, patients with OS caused by non-*RAG* mutations, and healthy control subjects. **B**, Amino acid frequencies of the CDR3s for all unique CD4<sup>+</sup> T-cell TCR $\beta$  sequences from patients with atypical SCID, patients with OS caused by *RAG* mutations, patients with OS caused by non-*RAG* mutations, and healthy control subjects (amino acids are ranked from hydrophilic to hydrophobic). **C**, Amino acid frequencies of the CDR3s for all unique CD8<sup>+</sup> T-cell TCR $\beta$  sequences from patients with atypical SCID, patients with OS caused by *RAG* mutations, patients with OS caused by non-*RAG* mutations, and healthy control subjects. **D**, Amino acid frequencies of the CDR3s for all unique CD8<sup>+</sup> T-cell TCR $\beta$  sequences from patients with atypical SCID, patients with OS caused by *RAG* mutations, patients with OS caused by non-*RAG* mutations, and healthy control subjects (amino acids are ranked from hydrophilic to hydrophobic). Negatively charged amino acids are shown in *light blue*, and positively charged amino acids are shown in *pink*.

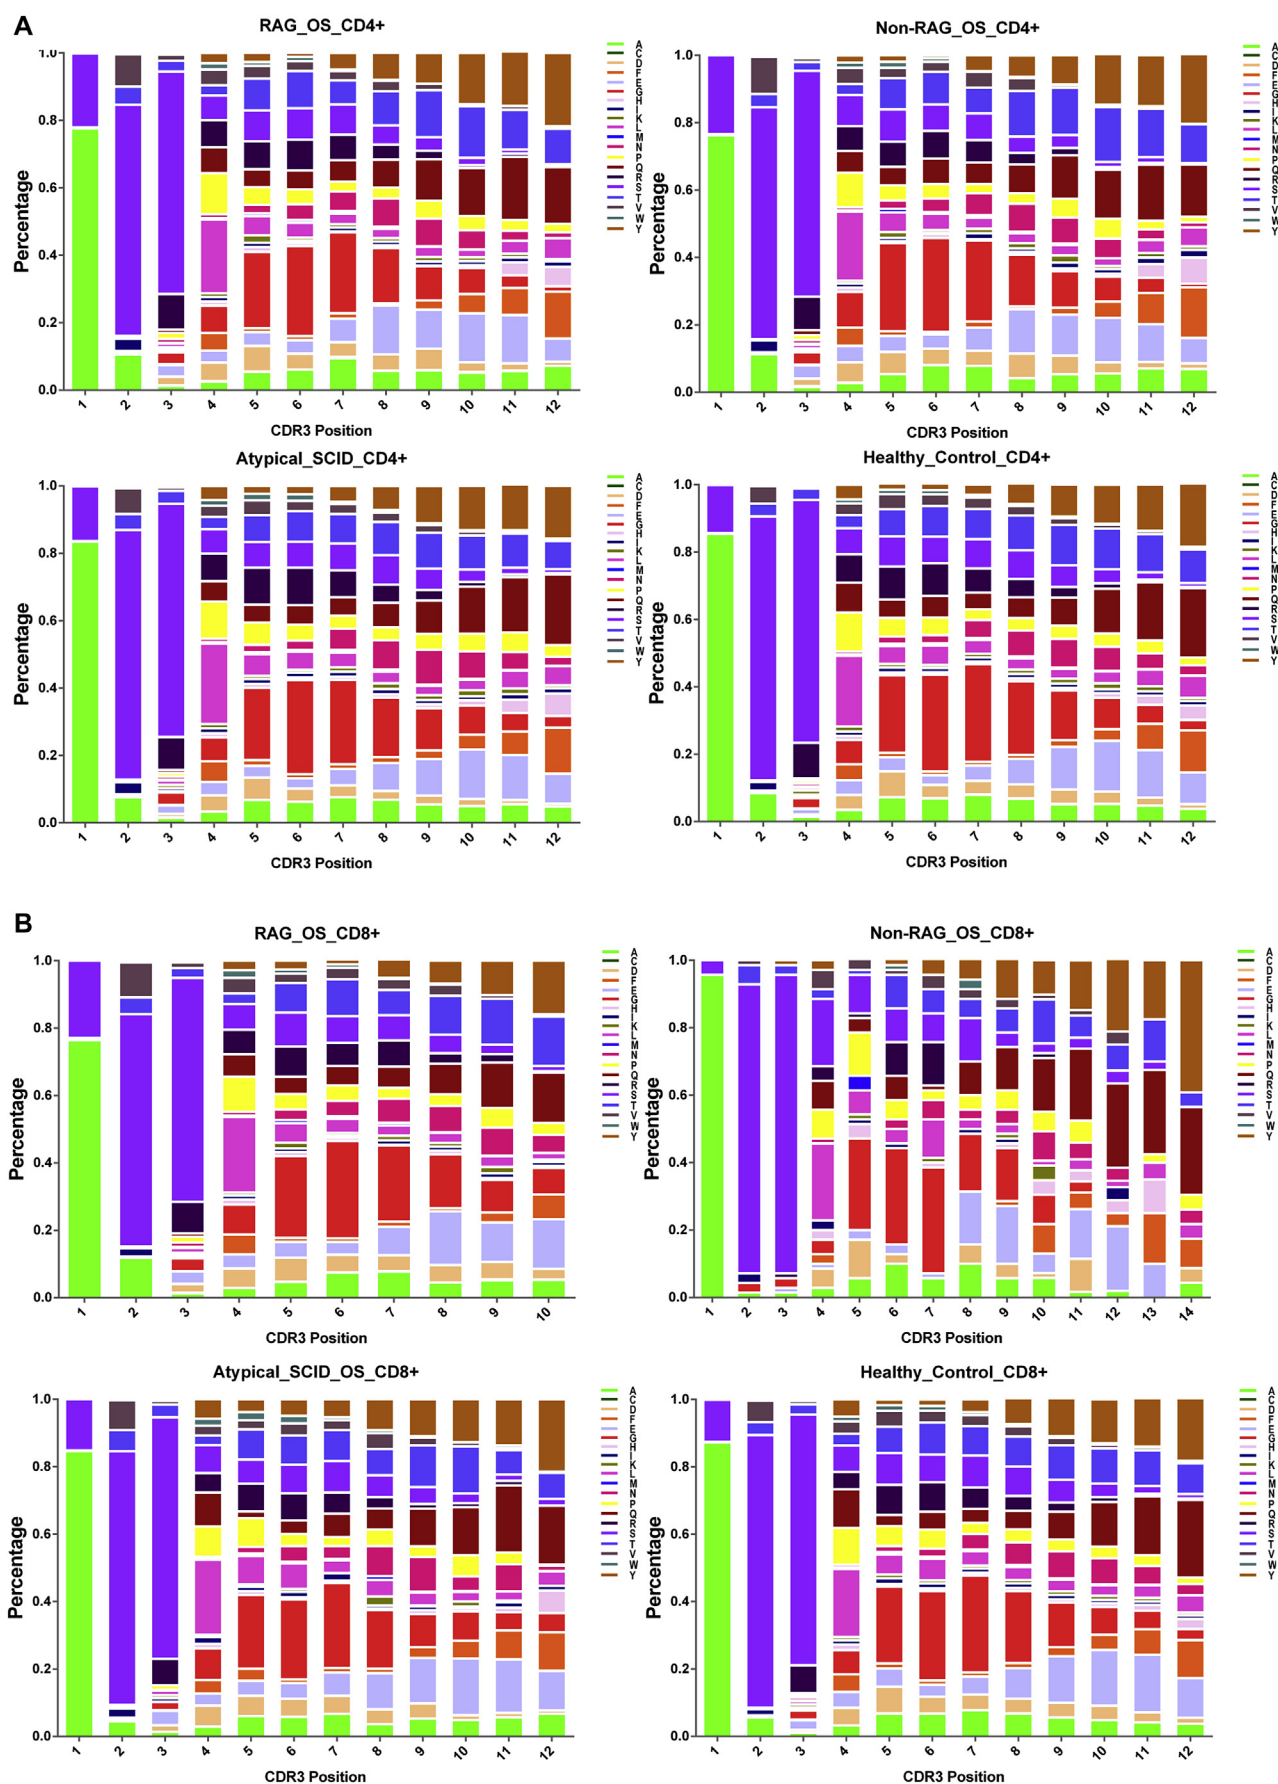

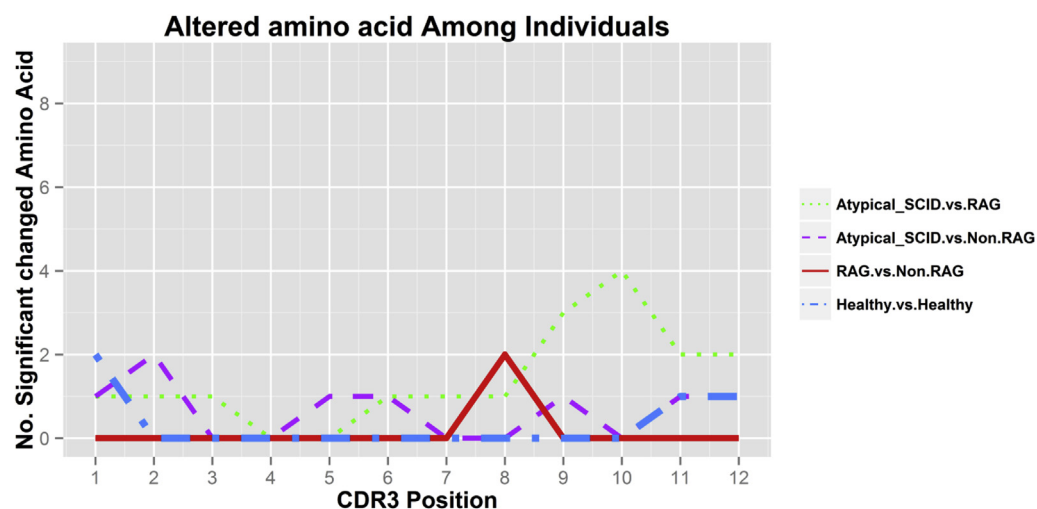

**FIG E11.** Number of significantly changed amino acids of CDR3s (position 1-36 nt) for all unique CD4<sup>+</sup> T-cell annotated TCR $\beta$  sequence reads from patients with atypical SCID compared with patients with OS caused by *RAG* mutations, patients with atypical SCID compared with patients with OS caused by non-*RAG* mutations, patients with OS caused by *RAG* mutations compared with patients with OS caused by non-*RAG* mutations, and among the healthy control subjects.

**FIG E10. A,** Amino acid composition of each position of CDR3s for all unique CD4<sup>+</sup> T-cell TCR $\beta$  sequences (position 1-36 nt) from patients with OS caused by *RAG* mutations, patients with OS caused by non-*RAG* mutations, patients with atypical SCID, and healthy control subjects. **B,** Amino acid composition of each position of CDR3s for all unique CD8<sup>+</sup> T-cell TCR $\beta$  sequences from patients with OS caused by *RAG* mutations (position 1-30 nt), patients with OS caused by non-*RAG* mutations (position 1-42 nt), patients with atypical SCID (position 1-36 nt), and healthy control subjects (position 1-36 nt).

**TABLE E1.** TCR $\beta$  sequence statistics\*

| Group           | Subject    | Cell type               | Cell count | Annotated TCR $\beta$ | Coverage         | Unique TCR $\beta$ |
|-----------------|------------|-------------------------|------------|-----------------------|------------------|--------------------|
| Atypical SCID   | CMNL13687† | CD4 <sup>+</sup>        | 26,657     | 474,311               | 17.7931125032824 | 1,753              |
|                 | 1228601†   | CD4 <sup>+</sup>        | 61,892     | 1,464,972             | 23.6698119304595 | 4,642              |
| RAG OS          | OS_RAG1    | CD4 <sup>+</sup>        | 161,500    | 1,525,164             | 9.44373993808049 | 1,668              |
|                 | OS_RAG2    | CD4 <sup>+</sup>        | 74,300     | 1,536,225             | 20.6759757738896 | 58                 |
|                 | OS_RAG3    | CD4 <sup>+</sup>        | 8,000      | 178,073               | 22.259125        | 35                 |
|                 | OS_RAG4    | CD4 <sup>+</sup>        | 23,400     | 413,879               | 17.6871367521367 | 244                |
|                 | OS_RAG5    | CD4 <sup>+</sup>        | 53,000     | 7,244,060             | 136.68037735849  | 110                |
| Non-RAG OS      | DIG†       | CD4 <sup>+</sup>        | 18,600     | 1,498,867             | 80.5842473118279 | 84                 |
|                 | PB7†       | CD4 <sup>+</sup> memory | 126,000    | 2,931,851             | 23.2686587301587 | 754                |
| Healthy control | C564       | CD4 <sup>+</sup>        | 1,000,000  | 48,861,777            | 48.861777        | 27,849             |
|                 | C572       | CD4 <sup>+</sup>        | 2,000,000  | 117,240,980           | 58.62049         | 39,916             |
|                 | P1         | CD4 <sup>+</sup>        | 1,000,000  | 29,620,188            | 29.620188        | 76,431             |
|                 | P2         | CD4 <sup>+</sup>        | 1,000,000  | 57,487,033            | 57.487033        | 53,072             |
| Atypical SCID   | CMNL13687  | CD8 <sup>+</sup>        | 1,973      | 44,655                | 22.6330461226558 | 134                |
|                 | 1228601    | CD8 <sup>+</sup>        | 5,417      | 166,476               | 30.7321395606424 | 305                |
| RAG OS          | OS_RAG1    | CD8 <sup>+</sup>        | 146,100    | 1,870,717             | 12.8043600273785 | 877                |
|                 | OS_RAG2    | CD8 <sup>+</sup>        | 64,000     | 1,697,549             | 26.524203125     | 24                 |
|                 | OS_RAG3    | CD8 <sup>+</sup>        | 6,300      | 233,789               | 37.109365079365  | 28                 |
|                 | OS_RAG4    | CD8 <sup>+</sup>        | 9,800      | 240,207               | 24.5109183673469 | 34                 |
|                 | OS_RAG5    | CD8 <sup>+</sup>        | 1,740      | 53,734                | 30.8816091954022 | 30                 |
| Non-RAG OS      | DIG        | CD8 <sup>+</sup>        | 12,000     | 2,263,323             | 188.61025        | 59                 |
|                 | PB7        | CD8 <sup>+</sup>        | 708        | 33,106                | 46.7598870056497 | 6                  |
| Healthy control | C564       | CD8 <sup>+</sup>        | 700,000    | 25,522,565            | 36.4608071428571 | 4,835              |
|                 | C572       | CD8 <sup>+</sup>        | 1,000,000  | 25,989,097            | 25.989097        | 17,333             |
|                 | P1         | CD8 <sup>+</sup>        | 1,000,000  | 24,868,092            | 24.868092        | 50,395             |
|                 | P2         | CD8 <sup>+</sup>        | 1,000,000  | 17,265,532            | 17.265532        | 109,599            |

\*Annotated TCR $\beta$ , Total sequences in which TCR $\beta$  V, D, and J genes could be identified; Cell count, cells were counted after sorting; Coverage, coverage is calculated as the total count of annotated reads/cell count used for library generation; Unique TCR $\beta$ , number of each TCR $\beta$  species.

†CMNL13687 is a patient with the *IL2RG* mutation, 1228601 is a patient with granulomatous disease caused by a *RAG* mutation, DIG is a patient with OS caused by atypical complete DiGeorge syndrome, and PB7 is a patient with OS caused by *ZAP70* mutation.

**TABLE E2.** Healthy control subjects and patients studied according to the clinical group with the list of mutations

|                                                      | Lymphocytosis | Erythroderma,<br>high IgE level | SCID-related infections | Autoimmunity | Granulomas |
|------------------------------------------------------|---------------|---------------------------------|-------------------------|--------------|------------|
| Healthy control subjects                             | No            | No                              | No                      | No           | No         |
| OS caused by <i>RAG</i> mutations (n = 5)            | Yes           | Yes                             | Yes                     | No           | No         |
| OS caused by <i>ZAP70</i> mutations                  | Yes           | Yes                             | Yes                     | No           | No         |
| OS caused by atypical complete DiGeorge syndrome     | Yes           | Yes                             | Yes                     | No           | No         |
| Granulomatous disease caused by <i>RAG</i> mutations | No            | No                              | Mild                    | Yes          | No         |
| <i>IL2RG</i> mutation                                | No            | No                              | Delayed, mild           | Yes          | Yes        |

TABLE E3. Primers used in amplifying TCR $\beta$ 

| Name                    | Code      | Sequence                                                              | Information         |
|-------------------------|-----------|-----------------------------------------------------------------------|---------------------|
| 5PIIA                   |           | <b>AAGCAGTGGTATCAACGCAGAGT</b>                                        | First PCR: F        |
| PE1 FCB ILL 1_2 V2      | 162448A01 | AATGATACGGCGACCACCGAGATCTACACTCTTTCCCTACACGACGCTCTTCCGATCT            | Second PCR: F1      |
| PE1 ILL BC 5PIIA 2_2 1  | 162820E06 | <i>CACGACGCTCTTCCGATCT</i> NN CGTGAT <b>AAGCAGTGGTATCAACGCAGAGT</b>   | BC 01: F2           |
| PE1 ILL BC 5PIIA 2_2 2  | 162820E12 | <i>CACGACGCTCTTCCGATCT</i> NNN ACATCG <b>AAGCAGTGGTATCAACGCAGAGT</b>  | BC 02: F2           |
| PE1 ILL BC 5PIIA 2_2 3  | 162820F07 | <i>CACGACGCTCTTCCGATCT</i> NNNN GCCTAA <b>AAGCAGTGGTATCAACGCAGAGT</b> | BC 03: F2           |
| PE1 ILL BC 5PIIA 2_2 4  | 162820E07 | <i>CACGACGCTCTTCCGATCT</i> NN TGGTCA <b>AAGCAGTGGTATCAACGCAGAGT</b>   | BC 04: F2           |
| PE1 ILL BC 5PIIA 2_2 5  | 162820F01 | <i>CACGACGCTCTTCCGATCT</i> NNN CACTGT <b>AAGCAGTGGTATCAACGCAGAGT</b>  | BC 05: F2           |
| PE1 ILL BC 5PIIA 2_2 6  | 162820F08 | <i>CACGACGCTCTTCCGATCT</i> NNNN ATTGGC <b>AAGCAGTGGTATCAACGCAGAGT</b> | BC 06: F2           |
| PE1 ILL BC 5PIIA 2_2 7  | 162820E08 | <i>CACGACGCTCTTCCGATCT</i> NN GATCTG <b>AAGCAGTGGTATCAACGCAGAGT</b>   | BC 07: F2           |
| PE1 ILL BC 5PIIA 2_2 8  | 162820F02 | <i>CACGACGCTCTTCCGATCT</i> NNN TCAAGT <b>AAGCAGTGGTATCAACGCAGAGT</b>  | BC 08: F2           |
| PE1 ILL BC 5PIIA 2_2 9  | 162820F09 | <i>CACGACGCTCTTCCGATCT</i> NNNN CTGATC <b>AAGCAGTGGTATCAACGCAGAGT</b> | BC 09: F2           |
| PE1 ILL BC 5PIIA 2_2 10 | 162820E11 | <i>CACGACGCTCTTCCGATCT</i> NN AAGCTA <b>AAGCAGTGGTATCAACGCAGAGT</b>   | BC 10: F2           |
| PE1 ILL BC 5PIIA 2_2 11 | 162820F03 | <i>CACGACGCTCTTCCGATCT</i> NNN GTAGCC <b>AAGCAGTGGTATCAACGCAGAGT</b>  | BC 11: F2           |
| PE1 ILL BC 5PIIA 2_2 12 | 162820F10 | <i>CACGACGCTCTTCCGATCT</i> NNNN TACAAG <b>AAGCAGTGGTATCAACGCAGAGT</b> | BC 12: F2           |
| PE1 ILL BC 5PIIA 2_2 13 | 162820E10 | <i>CACGACGCTCTTCCGATCT</i> NN TTGACT <b>AAGCAGTGGTATCAACGCAGAGT</b>   | BC 13: F2           |
| PE1 ILL BC 5PIIA 2_2 14 | 162820F04 | <i>CACGACGCTCTTCCGATCT</i> NNN GGAACT <b>AAGCAGTGGTATCAACGCAGAGT</b>  | BC 14: F2           |
| PE1 ILL BC 5PIIA 2_2 15 | 162820F11 | <i>CACGACGCTCTTCCGATCT</i> NNNN TGACAT <b>AAGCAGTGGTATCAACGCAGAGT</b> | BC 15: F2           |
| PE1 ILL BC 5PIIA 2_2 16 | 162820E05 | <i>CACGACGCTCTTCCGATCT</i> NN GGACGG <b>AAGCAGTGGTATCAACGCAGAGT</b>   | BC 16: F2           |
| PE1 ILL BC 5PIIA 2_2 17 | 162820F05 | <i>CACGACGCTCTTCCGATCT</i> NNN CTCTAC <b>AAGCAGTGGTATCAACGCAGAGT</b>  | BC 17: F2           |
| PE1 ILL BC 5PIIA 2_2 18 | 162820F12 | <i>CACGACGCTCTTCCGATCT</i> NNNN GCGGAC <b>AAGCAGTGGTATCAACGCAGAGT</b> | BC 18: F2           |
| PE1 ILL BC 5PIIA 2_2 19 | 162820E09 | <i>CACGACGCTCTTCCGATCT</i> NN TTTCAC <b>AAGCAGTGGTATCAACGCAGAGT</b>   | BC 19: F2           |
| PE1 ILL BC 5PIIA 2_2 20 | 162820G01 | <i>CACGACGCTCTTCCGATCT</i> NNNN GGCCAC <b>AAGCAGTGGTATCAACGCAGAGT</b> | BC 20: F2           |
| HS RJ1_1                | 162820C04 | TTCAGGTCCTCTACAACCTGTGAGTCTGGTGCC                                     | Human read 2 primer |
| HS RJ1_2                | 162820C05 | TTCAGGTCCTCTACAACGGTTAACCTGGTGCC                                      | Human read 2 primer |
| HS RJ1_3                | 162820C02 | TTCAGGTCCTCTACAACAGTGAGCCAACTTCC                                      | Human read 2 primer |
| HS RJ1_4                | 162820D01 | TTCAGGTCCTCCAAGACAGAGAGCTGGGTTCC                                      | Human read 2 primer |
| HS RJ1_5                | 162820D02 | TTCAGGTCCTCTAGGATGGAGAGTCGAGTCCC                                      | Human read 2 primer |
| HS RJ1_6                | 162820C08 | TTCAGGTCCTCTGTACAGTGAGCCTGGTGCC                                       | Human read 2 primer |
| HS RJ2-1                | 162820C07 | TTCAGGTCCTCTAGCACGGTGAGCCGTGTCCC                                      | Human read 2 primer |
| HS RJ2-2                | 162820C06 | TTCAGGTCCTCCAGTACGGTCAGCCTAGAGCC                                      | Human read 2 primer |
| HS RJ2-3                | 162820C03 | TTCAGGTCCTCGAGCACTGTCAGCCGGGTGCC                                      | Human read 2 primer |
| HS RJ2-4                | 162820C10 | TTCAGGTCCTCCAGCACTGAGAGCCGGGTCCC                                      | Human read 2 primer |
| HS RJ2-5                | 162820C12 | TTCAGGTCCTCGAGCACCAAGAGCCGCGTGCC                                      | Human read 2 primer |
| HS RJ2-6                | 162820C09 | TTCAGGTCCTCCAGCACGGTCAGCCTGCTGCC                                      | Human read 2 primer |
| HS RJ2-7                | 162820C11 | TTCAGGTCCTCTGTGACCGTGAGCCTGGTGCC                                      | Human read 2 primer |
